# Supplementary material for: Protective effects of chlorogenic acid on the meat quality of oxidatively stressed broilers revealed by integrated metabolomics and antioxidant analysis
Source: Royal Society of Chemistry journal article supplement (doi:10.1039/d1fo03622j), 2022-01-01
Supplement: d1fo03622j1.pdf [file d1fo03622j1.pdf]

**Table S1 Composition and nutrition of the basal diet (air-dry basis)**

| Item                         | Content (%) |
|------------------------------|-------------|
| Corn                         | 61.38       |
| Soybean meal                 | 31.00       |
| Fish meal                    | 2.00        |
| Soybean oil                  | 2.00        |
| Limestone                    | 1.50        |
| CaHPO <sub>4</sub>           | 1.30        |
| <i>DL</i> -Methionine        | 0.22        |
| NaCl                         | 0.30        |
| Premix <sup>1</sup>          | 0.20        |
| Choline chloride             | 0.10        |
| Total                        | 100.00      |
| Nutrient levels              |             |
| Metabolizable energy (MJ/kg) | 12.47       |
| Crude protein (%)            | 20.55       |
| Crude Fat (%)                | 4.59        |
| Calcium (%)                  | 0.95        |
| Available phosphorus (%)     | 0.46        |
| Lysine (%)                   | 1.10        |
| Methionine (%)               | 0.55        |

<sup>1</sup> The premix provided the following per kg of diets: Vitamin A (trans-retinyl acetate) 8000 IU; Vitamin D3 (cholecalciferol) 3000 IU; Vitamin E (all-rac- $\alpha$ -tocopherol acetate) 20 IU; Vitamin B1 (thiamin) 4.2 mg; Vitamin B2 (riboflavin) 4.0 mg; Vitamin B6 (pyridoxine HCl) 4.5 mg; Vitamin B12 (cobalamin) 0.02 mg; biotin 0.15 mg; folic acid 1.0 mg; *D*-pantothenic acid 11 mg; nicotinic acid 10 mg; Cu (as copper sulfate) 10 mg; Fe (as ferrous sulfate) 80 mg; Mn (as manganese sulfate) 80 mg; Zn (as zinc sulfate) 75 mg; I (as potassium iodide) 0.40 mg; Se (as sodium selenite) 0.30 mg.

**Table S2 Primers used for quantitative RT-qPCR**

| Gene          | Primer sequence(5'-3')                                              | Product size (bp) | GenBank accession No. |
|---------------|---------------------------------------------------------------------|-------------------|-----------------------|
| <i>SOD</i>    | Forward: TTACCGCTTGTCTGATGGAG<br>Reverse: TCACCCACGTGCCTATCTG       | 145               | NM_205064.1           |
| <i>CAT</i>    | Forward: GCTGAAGCTGGGAAAAAGGATG<br>Reverse: TCCTGCAGTTGTATGGACGC    | 136               | NM_001031215.2        |
| <i>GSH-Px</i> | Forward: GCCAAGTCCTTCTACGACCT<br>Reverse: TTGGTGCCGTTCTCCTGGTAG     | 224               | NM_001277854.2        |
| <i>GST</i>    | Forward: TCCAGTCTTTGAGAAGTTTTG Reverse:<br>GGAGTTTCAGTGGGTTTAGGT    | 296               | NM_001001777.1        |
| <i>Keap1</i>  | Forward: GCACTTGCATGTTTACCTTAAGAA<br>Reverse: TGCTCATCTCAGCCTATCTGT | 88                | NM_176508.3           |
| <i>Nrf2</i>   | Forward: AGGAAGAAGGTGCTTTTCGCA Reverse:<br>TCTGTTCTCTTCACTGCCAC     | 176               | NM_205117.1           |
| <i>HO-1</i>   | Forward: ACAACGCTGAAAGCATGTCCC Reverse:<br>AGATGAAGTACAGGGACGCC     | 162               | NM_205344.1           |
| <i>NQO-1</i>  | Forward: CGCACCTGAGAAAACCTCT<br>Reverse: ACTGCAGTGGGAAGTGAAG        | 166               | NM_001277619.1        |
| <i>GCLC</i>   | Forward: AAGAGATGCTGTTCCGGCAGG<br>Reverse: CCACAACGACATTTCCACCTTT   | 71                | XM_040666478.1        |
| <i>GCLM</i>   | Forward: TCAGCAGGGGCTCTAAGTGT<br>Reverse: TTTCCACACAGTGCTACGA       | 208               | NM_001007953.1        |
| <i>GSTA4</i>  | Forward: AGAGGTGAGACTGTGCCTGTA<br>Reverse: ACAGCAGGGATCCATCTTGGC    | 159               | NM_204818.2           |
| <i>GAPDH</i>  | Forward: GGGCAGCCATCACTATCTT<br>Reverse: TAACACGCTTAGCACACCC        | 148               | NM-204305.1           |
