# Supplementary material for: Protective effects of chlorogenic acid on the meat quality of oxidatively stressed broilers revealed by integrated metabolomics and antioxidant analysis
Source: Royal Society of Chemistry journal article supplement (doi:10.1039/d1fo03622j), 2022-01-01
Supplement: d1fo03622j2.pdf [file d1fo03622j2.pdf]

**Table S3 The list of differential metabolites between control and DEX groups**

| Compounds                                                   | VIP      | Fold Change | Log2FC   |
|-------------------------------------------------------------|----------|-------------|----------|
| 4-Hydroxy-L-Glutamic Acid                                   | 1.834961 | 0.292306    | -1.77445 |
| D-Alanyl-D-Alanine                                          | 1.74647  | 0.17264     | -2.53416 |
| N6-Acetyl-L-Lysine                                          | 1.662565 | 0.378057    | -1.40332 |
| N-Phenylacetyl glycine                                      | 1.761646 | 0.433484    | -1.20595 |
| Uridine                                                     | 1.495553 | 0.422001    | -1.24468 |
| Succinic Acid                                               | 1.515075 | 4.501145    | 2.170292 |
| Citramalic Acid                                             | 1.406165 | 0.424358    | -1.23665 |
| 3-Hydroxy-3-Methyl Butyric Acid                             | 1.589966 | 2.156907    | 1.108964 |
| Methylmalonic Acid                                          | 1.515075 | 4.501145    | 2.170292 |
| Phenylpyruvic Acid                                          | 1.452233 | 11.48343    | 3.521481 |
| O-Phosphorylethanolamine                                    | 1.481699 | 0.489059    | -1.03192 |
| 9-HpODE                                                     | 1.725883 | 2.622019    | 1.390678 |
| 9,10-DiHOME [(±)9,10-dihydroxy-12Z-octadecenoic acid]       | 1.765199 | 3.882635    | 1.957036 |
| γ-Linolenic Acid(C18:3N6)                                   | 1.643698 | 2.091015    | 1.064203 |
| Palmitoleic Acid(C16:1)                                     | 1.731844 | 2.647301    | 1.404522 |
| Α-Linolenic Acid(C18:3N3)                                   | 1.643698 | 2.091015    | 1.064203 |
| 2'-Deoxycytidine-5'-Monophosphate                           | 1.731278 | 0.416168    | -1.26476 |
| Aminomalonic Acid                                           | 1.493634 | 4.354166    | 2.122396 |
| 8,15-Dihete                                                 | 1.692382 | 2.534989    | 1.34198  |
| Acetyl Tryptophan                                           | 1.594871 | 0.077348    | -3.69249 |
| ADP-ribose                                                  | 1.356111 | 2.774148    | 1.472044 |
| N-(2-Methylbenzoyl)glycine                                  | 1.761646 | 0.433484    | -1.20595 |
| 11,12-EET [(±)11,(12)-epoxy-5Z,8Z,14Z-eicosatrienoic acid]  | 1.216257 | 0.230822    | -2.11515 |
| 15-oxoETE [15-oxo-5Z,8Z,11Z,13E-eicosatetraenoic acid]      | 1.243536 | 0.03273     | -4.93323 |
| 9-oxoODE [9-oxo-10E,12Z-octadecadienoic acid]               | 1.444279 | 2.208159    | 1.142844 |
| Prostaglandin E2                                            | 1.247323 | 0.272039    | -1.87811 |
| PGF2α [9α,11α,15S-trihydroxy-prosta-5Z,13E-dien-1-oic acid] | 1.248447 | 0.108476    | -3.20456 |
| 3-Hydroxyglutaric acid                                      | 1.4507   | 0.375645    | -1.41256 |
| N-Amidino-L-Aspartate                                       | 1.591972 | 0.350703    | -1.51168 |
| (S) -2-Hydroxyglutaric acid                                 | 1.406165 | 0.424358    | -1.23665 |
| 9,12-octadecadienoic acid                                   | 1.562244 | 2.15458     | 1.107407 |
| 12,13-DiHOME                                                | 1.765199 | 3.882635    | 1.957036 |
| Glutathione                                                 | 1.505768 | 0.156694    | -2.67398 |
| L-arabinonic acid-1,4-lactone                               | 1.4507   | 0.375645    | -1.41256 |
| L-2-amino-6-oximelic acid                                   | 1.831239 | 0.474918    | -1.07425 |
| PysoPE 16:1                                                 | 1.548983 | 2.072849    | 1.051615 |
| 2-Hydroxy-2-methylbutyric acid                              | 1.765078 | 3.198318    | 1.677313 |

|                                                          |          |          |          |
|----------------------------------------------------------|----------|----------|----------|
| (5-L-Glutamyl)-L-Amino Acid                              | 1.653021 | 0.427678 | -1.2254  |
| Glutathione Oxidized                                     | 1.479603 | 0.150825 | -2.72905 |
| L-Homocystine                                            | 1.367321 | 2.333505 | 1.222499 |
| N-Acetyl-L-Tyrosine                                      | 1.56956  | 0.128603 | -2.959   |
| N $\alpha$ -Acetyl-L-Arginine                            | 1.413115 | 0.069492 | -3.847   |
| Deoxyguanosine                                           | 1.478171 | 0.463999 | -1.10781 |
| Thymidine                                                | 1.747298 | 0.412371 | -1.27798 |
| Uracil                                                   | 1.678213 | 0.460654 | -1.11824 |
| 5-Aminovaleric Acid                                      | 1.941767 | 0.089904 | -3.47546 |
| DI-2-Aminooctanoic Acid                                  | 1.738662 | 0.460392 | -1.11906 |
| Guanidineacetic Acid                                     | 1.913157 | 0.092057 | -3.44133 |
| Uric acid                                                | 1.73982  | 2.157549 | 1.109393 |
| Lysopc 14:0                                              | 1.640752 | 0.432025 | -1.21081 |
| Deoxyadenosine                                           | 1.481223 | 0.324232 | -1.6249  |
| L-Homoarginine                                           | 1.661632 | 0.230334 | -2.1182  |
| 11-Cis-Retinol                                           | 1.739785 | 3.029073 | 1.598877 |
| Cys-Gly                                                  | 1.670744 | 0.475967 | -1.07107 |
| 2-Aminoadipic Acid                                       | 1.604575 | 0.33278  | -1.58736 |
| Sn-Glycero-3-Phosphocholine                              | 1.663623 | 0.279652 | -1.8383  |
| Thiamine                                                 | 1.343883 | 0.428322 | -1.22323 |
| Stearidonic Acid                                         | 1.5635   | 2.420423 | 1.275259 |
| N-Alpha-acetyllysine                                     | 1.689422 | 0.227319 | -2.13721 |
| 2-Methylbutyroylcarnitine                                | 1.386654 | 3.084453 | 1.625015 |
| N $\alpha$ -Acetyl-L-glutamine                           | 1.652658 | 0.277534 | -1.84926 |
| N-Methyl-L-Glutamate                                     | 1.658001 | 0.291808 | -1.77691 |
| 5'-Deoxyadenosine                                        | 1.481223 | 0.324232 | -1.6249  |
| N-(2-hydroxyethyl)stearamide                             | 1.792101 | 2.355554 | 1.236067 |
| 1-Single Palm Essence                                    | 1.875232 | 2.484027 | 1.312681 |
| Arachidyl glycine                                        | 1.524533 | 3.782555 | 1.919361 |
| D-Fructose 6-phosphate                                   | 1.544426 | 0.088994 | -3.49015 |
| Hemolytic PAF C-18                                       | 1.732851 | 2.504741 | 1.324662 |
| 2-O-ethyl PAF C-16                                       | 1.732851 | 2.504741 | 1.324662 |
| 1-O-palmitoyl-2-O-acetyl-sn-glycerol-3-phosphate choline | 1.559046 | 0.266043 | -1.91027 |
| N-Methyl- $\alpha$ -aminoisobutyric acid                 | 1.560024 | 0.19703  | -2.34351 |
| Biotinamide                                              | 1.885201 | 5.83451  | 2.544611 |
| Cytarabine                                               | 1.446226 | 0.497888 | -1.00611 |
| LysoPC 22:4 (2n isomer1)                                 | 1.263422 | 0.313625 | -1.67289 |
| LysoPC 22:4                                              | 1.263422 | 0.313625 | -1.67289 |
| LysoPC 22:5 (2n isomer3)                                 | 1.250915 | 0.299341 | -1.74014 |
| LysoPC 22:5 (2n isomer2)                                 | 1.250915 | 0.299341 | -1.74014 |
| LysoPC 18:3(2n isomer3)                                  | 1.242689 | 2.472806 | 1.306149 |
| mycosporine-glutaminol                                   | 1.802239 | 0.043188 | -4.53323 |
| Alanine tyrosine                                         | 1.591482 | 0.224436 | -2.15563 |

---

|                         |          |          |          |
|-------------------------|----------|----------|----------|
| Carnitine C20:5         | 1.312247 | 4.564703 | 2.190521 |
| Carnitine C19:0         | 1.241493 | 6.349249 | 2.666586 |
| Carnitine C18:1         | 1.207013 | 2.443682 | 1.289057 |
| Carnitine C14:3         | 1.392502 | 6.546167 | 2.71065  |
| Carnitine C9:DC         | 1.235488 | 0.445024 | -1.16804 |
| Carnitine C8-OH         | 1.261908 | 0.395371 | -1.33872 |
| Carnitine C9:0          | 1.493693 | 3.818613 | 1.933049 |
| Carnitine C6:DC         | 1.462059 | 3.342186 | 1.740792 |
| Carnitine C5:1          | 1.872993 | 5.805153 | 2.537334 |
| SDMA                    | 1.566616 | 0.368221 | -1.44136 |
| Methylguanidine         | 1.844461 | 0.188515 | -2.40725 |
| Phe-Met                 | 1.442611 | 3.483536 | 1.800552 |
| Carnitine C18:1 Isomer1 | 1.207141 | 2.366057 | 1.242485 |

---

**Table S4 The list of differential metabolites between DEX and DEX\_CGA groups**

| Compounds                                               | VIP      | Fold Change | Log2FC   |
|---------------------------------------------------------|----------|-------------|----------|
| Glycocholic Acid                                        | 1.275724 | 0.329585    | -1.60128 |
| Xanthine                                                | 1.575224 | 0.387271    | -1.36858 |
| Succinic Acid                                           | 1.680772 | 0.152706    | -2.71117 |
| 2-Hydroxyisocaproic Acid                                | 1.773975 | 0.421318    | -1.24702 |
| Methylmalonic Acid                                      | 1.680772 | 0.152706    | -2.71117 |
| Phenyllactate(Pla)                                      | 1.598711 | 0.325116    | -1.62097 |
| Phenylpyruvic Acid                                      | 1.322356 | 0.179692    | -2.4764  |
| 13-HOTrE [13S-hydroxy-9Z,11E,15Z-octadecatrienoic acid] | 1.216403 | 0.476072    | -1.07075 |
| Aminomalonic Acid                                       | 1.71095  | 0.154611    | -2.69328 |
| 2-Deoxyribose 1-Phosphate                               | 1.571005 | 0.436094    | -1.19729 |
| Indole-3-lactic acid                                    | 1.810689 | 0.26017     | -1.94247 |
| Xanthosine                                              | 2.165148 | 0.279902    | -1.83701 |
| N-lactoyl-phenylalanine                                 | 1.989071 | 0.338934    | -1.56092 |
| D-Malic acid                                            | 1.613331 | 0.441856    | -1.17835 |
| Cysteine glutathione disulfide                          | 1.348269 | 0.405507    | -1.3022  |
| 7-ketolithocholic acid                                  | 1.939772 | 0.086867    | -3.52505 |
| 12-ketolithocholic acid                                 | 1.939772 | 0.086867    | -3.52505 |
| Gamma-Mercholic Acid                                    | 2.153594 | 0.180138    | -2.47283 |
| Orthocholic acid                                        | 1.491213 | 0.162992    | -2.61712 |
| (S)-Leucic acid                                         | 1.85999  | 0.399424    | -1.32401 |
| Glycohyodeoxycholic acid                                | 1.37936  | 0.276593    | -1.85416 |
| L-Alanyl-L-Lysine                                       | 1.820256 | 0.135503    | -2.8836  |
| N-Acetylhistamine                                       | 1.583883 | 0.424831    | -1.23504 |
| 5-Aminovaleric Acid                                     | 1.350473 | 0.494185    | -1.01688 |
| 2-(Formylamino)Benzoic Acid                             | 2.119871 | 0.309283    | -1.693   |
| 2-Methylbutyroylcarnitine                               | 1.696494 | 0.166186    | -2.58913 |
| Oxypurinol                                              | 1.515027 | 0.452929    | -1.14264 |
| Dodecylcarnitine                                        | 1.225503 | 0.367734    | -1.44327 |
| Taurochenodesoxycholic Acid                             | 1.964825 | 0.310497    | -1.68735 |
| N-Methyl- $\alpha$ -aminoisobutyric acid                | 1.388629 | 3.03303     | 1.60076  |
| ( $\pm$ )-Myristylcarnitine                             | 1.246997 | 0.441107    | -1.1808  |
| Biotinamide                                             | 1.704703 | 0.326007    | -1.61702 |
| Carnitine C20:1-OH                                      | 1.346564 | 0.169223    | -2.56301 |
| Carnitine C21:2                                         | 2.022899 | 0.008619    | -6.85822 |
| Carnitine C21:3                                         | 1.980766 | 0.021531    | -5.53741 |
| Carnitine C20:1                                         | 1.737094 | 0.196391    | -2.3482  |
| Carnitine C20:2                                         | 1.857925 | 0.21995     | -2.18475 |
| Carnitine C19:0                                         | 1.842466 | 0.017489    | -5.83741 |
| Carnitine C17:1:DC                                      | 1.612011 | 0.424875    | -1.23489 |
| Carnitine C18:2-OH                                      | 1.407336 | 0.461343    | -1.11609 |
| Carnitine C19:2                                         | 1.87666  | 0.021784    | -5.5206  |

---

|                          |          |          |          |
|--------------------------|----------|----------|----------|
| Carnitine C15:DC         | 1.282411 | 0.478681 | -1.06286 |
| Carnitine C17:0          | 1.81754  | 0.040378 | -4.63028 |
| Carnitine C14:1-OH       | 1.539383 | 0.454961 | -1.13619 |
| Carnitine C15:1          | 1.91036  | 0.041286 | -4.59819 |
| Carnitine C14:2-OH       | 1.615661 | 0.499523 | -1.00138 |
| Carnitine C14:0          | 1.205494 | 0.452795 | -1.14307 |
| Carnitine C14:1          | 1.263499 | 0.352265 | -1.50527 |
| Carnitine C13:0          | 1.895442 | 0.050472 | -4.30838 |
| Carnitine C13:1          | 1.565862 | 0.059425 | -4.07279 |
| Carnitine C9:DC          | 1.424681 | 0.395115 | -1.33966 |
| Carnitine C11:0          | 1.903002 | 0.050948 | -4.29482 |
| Carnitine C9:0           | 2.001505 | 0.024277 | -5.36428 |
| Carnitine C8:1           | 1.419009 | 0.248871 | -2.00653 |
| Carnitine C7:0           | 1.44833  | 0.186378 | -2.4237  |
| Carnitine C7:1           | 1.56291  | 0.042958 | -4.54092 |
| Carnitine C5:1           | 1.694052 | 0.322373 | -1.6332  |
| 8-Azaguanine             | 1.848047 | 0.415894 | -1.26571 |
| Carnitine C13:0 Isomer1  | 1.906504 | 0.052175 | -4.26049 |
| Carnitine C15 Isomer1    | 1.902713 | 0.042336 | -4.56197 |
| Carnitine C15            | 1.874665 | 0.046147 | -4.43763 |
| Carnitine C16:2-OH       | 1.657053 | 0.380883 | -1.39258 |
| Carnitine C18:1-OH       | 1.579334 | 0.412866 | -1.27625 |
| Carnitine C19            | 1.591974 | 0.401857 | -1.31525 |
| Carnitine C20:1 Isomer 1 | 1.740367 | 0.192485 | -2.37718 |

---

**Table S5 The list of differential metabolites between control and CGA groups**

| Compounds                                             | VIP      | Fold Change | Log2FC   |
|-------------------------------------------------------|----------|-------------|----------|
| Citramalic Acid                                       | 1.480642 | 0.437724    | -1.19191 |
| D-Glucose 6-Phosphate                                 | 1.3886   | 2.887892    | 1.530017 |
| L-Fucose                                              | 1.887033 | 3.990861    | 1.9967   |
| L-Rhamnose                                            | 1.887033 | 3.990861    | 1.9967   |
| Pantothenol                                           | 1.817914 | 0.497699    | -1.00665 |
| 3-Hydroxybutyrate                                     | 1.902401 | 4.369049    | 2.127319 |
| Malonicacid                                           | 1.904732 | 4.288975    | 2.100633 |
| 9-HpODE                                               | 1.723345 | 2.249023    | 1.169299 |
| 9,10-DiHOME [(±)9,10-dihydroxy-12Z-octadecenoic acid] | 1.805367 | 3.813695    | 1.931189 |
| Palmitoleic Acid(C16:1)                               | 1.539986 | 2.31967     | 1.21392  |
| 8,15-Dihete                                           | 1.61296  | 2.569359    | 1.361409 |
| Indole-3-lactic acid                                  | 1.71858  | 0.38595     | -1.37351 |
| Xanthosine                                            | 1.650674 | 0.453152    | -1.14193 |
| ADP-ribose                                            | 1.410056 | 2.097589    | 1.068732 |
| D-Malic acid                                          | 1.433354 | 0.303683    | -1.71936 |
| 9-oxoODE [9-oxo-10E,12Z-octadecadienoic acid]         | 1.640685 | 2.56734     | 1.360275 |
| 3-Hydroxyglutaric acid                                | 1.484946 | 0.459791    | -1.12095 |
| (S) -2-Hydroxyglutaric acid                           | 1.480642 | 0.437724    | -1.19191 |
| 9,12-octadecadienoic acid                             | 1.766084 | 3.276754    | 1.712268 |
| 12,13-DiHOME                                          | 1.805367 | 3.813695    | 1.931189 |
| L-arabinonic acid-1,4-lactone                         | 1.484946 | 0.459791    | -1.12095 |
| D-Mannose 6-phosphate                                 | 1.387784 | 2.516683    | 1.331523 |
| Mannose 1-phosphate                                   | 1.465783 | 3.028588    | 1.598645 |
| L-Homocystine                                         | 1.413453 | 2.09525     | 1.067122 |
| 5-Aminovaleric Acid                                   | 1.98049  | 0.272526    | -1.87553 |
| Guanidineacetic Acid                                  | 1.857131 | 0.296475    | -1.75402 |
| Maleic Acid                                           | 1.822826 | 0.492423    | -1.02203 |
| 2-(Formylamino)Benzoic Acid                           | 1.597058 | 0.497379    | -1.00758 |
| 11-Cis-Retinol                                        | 2.207804 | 6.347052    | 2.666087 |
| 3-Hydroxykynurenine                                   | 1.816195 | 3.281155    | 1.714204 |
| Stearidonic Acid                                      | 1.847868 | 4.261915    | 2.091502 |
| 2-Methylbutyroylcarnitine                             | 1.357291 | 0.275766    | -1.85848 |
| Threoninyl-Phenylalanine                              | 1.572416 | 2.167196    | 1.115829 |
| Valyl-leucine                                         | 1.296865 | 2.529386    | 1.338787 |
| N-(2-hydroxyethyl)stearamide                          | 1.993285 | 2.546677    | 1.348616 |
| Taurochenodesoxycholic Acid                           | 1.834369 | 0.152051    | -2.71737 |
| 1-Single Palm Essence                                 | 2.12445  | 2.715079    | 1.440994 |
| Arachidyl glycine                                     | 1.729054 | 3.235099    | 1.69381  |
| Calcitriol                                            | 1.945264 | 2.291502    | 1.196293 |
| Hexanoylcarnitine                                     | 1.411695 | 0.493935    | -1.01761 |

---

|                         |          |          |          |
|-------------------------|----------|----------|----------|
| MAG(16:1)isomer         | 2.235256 | 2.070618 | 1.050062 |
| MAG(16:1)               | 2.235256 | 2.070618 | 1.050062 |
| LysoPC 18:3(2n isomer3) | 1.368172 | 2.278821 | 1.188288 |
| Carnitine C20:1-OH      | 1.221339 | 0.196173 | -2.3498  |
| Carnitine C21:3         | 1.294616 | 0.026051 | -5.26252 |
| Carnitine C19:2         | 1.306551 | 0.059512 | -4.07068 |
| Carnitine C15:1         | 1.348368 | 0.085759 | -3.54357 |
| Carnitine C13:0         | 1.43063  | 0.086652 | -3.52862 |
| Carnitine C9:DC         | 1.951319 | 0.269151 | -1.89351 |
| Carnitine C11:0         | 1.461504 | 0.119992 | -3.05899 |
| Carnitine C7:0          | 1.677235 | 0.341439 | -1.5503  |
| Carnitine C6:0 Isomer 2 | 1.411695 | 0.493935 | -1.01761 |
| Carnitine C6:0 Isomer 1 | 1.419231 | 0.494055 | -1.01726 |
| Carnitine C6:0          | 1.411695 | 0.493935 | -1.01761 |
| Carnitine C5:0 Isomer   | 1.592956 | 0.398427 | -1.32761 |
| Carnitine C5:0          | 1.615238 | 0.398    | -1.32916 |
| Octadecadienamide       | 1.87088  | 2.082258 | 1.058149 |
| Carnitine C13:0 Isomer1 | 1.494424 | 0.078969 | -3.66257 |
| Carnitine C15 Isomer1   | 1.50839  | 0.084632 | -3.56265 |
| Carnitine C15           | 1.487417 | 0.075518 | -3.72704 |

---

**Table S6 The list of differential metabolites between CGA and DEX\_CGA groups**

| Compounds                         | VIP      | Fold Change | Log2FC   |
|-----------------------------------|----------|-------------|----------|
| 4-Hydroxy-L-Glutamic Acid         | 2.029561 | 0.19137     | -2.38556 |
| 5-Hydroxy-L-Tryptophan            | 2.007681 | 0.397444    | -1.33118 |
| D-Alanyl-D-Alanine                | 1.958007 | 0.26616     | -1.90964 |
| L-Cystathionine                   | 1.424501 | 0.470381    | -1.0881  |
| Xanthine                          | 1.494647 | 0.430213    | -1.21688 |
| D-Mannose                         | 2.087825 | 0.498645    | -1.00391 |
| 3-Hydroxybutyrate                 | 1.250479 | 0.463898    | -1.10812 |
| Malonicacid                       | 1.260345 | 0.45623     | -1.13217 |
| O-Phosphorylethanolamine          | 1.951401 | 0.304087    | -1.71744 |
| Dodecanoic Acid(C12:0)            | 1.568085 | 0.471676    | -1.08413 |
| 2'-Deoxycytidine-5'-Monophosphate | 2.037793 | 0.353225    | -1.50134 |
| Acetyl Tryptophan                 | 1.568665 | 0.066744    | -3.90522 |
| Hydroxyphenyllactic acid          | 1.359812 | 0.444822    | -1.1687  |
| Myoinositol                       | 2.087825 | 0.498645    | -1.00391 |
| Cysteine glutathione disulfide    | 1.354367 | 0.295059    | -1.76092 |
| N-Amidino-L-Aspartate             | 1.470803 | 0.438684    | -1.18875 |
| 9,12-octadecadienoic acid         | 1.217705 | 0.4714      | -1.08498 |
| Glutathione                       | 1.852531 | 0.254991    | -1.97148 |
| L-2-amino-6-oximelic acid         | 1.989319 | 0.420833    | -1.24868 |
| 2-Hydroxy-2-methylbutyric acid    | 1.667892 | 2.213462    | 1.146305 |
| Glutathione Oxidized              | 1.913649 | 0.233269    | -2.09993 |
| Glutathione Reducedform           | 2.027052 | 0.456405    | -1.13161 |
| N-Acetyl-L-Glutamic Acid          | 2.042643 | 0.439625    | -1.18565 |
| N-Acetyl-L-Tyrosine               | 1.610866 | 0.195757    | -2.35286 |
| N $\alpha$ -Acetyl-L-Arginine     | 1.345596 | 0.092789    | -3.4299  |
| N-Acetylhistamine                 | 1.567591 | 0.440352    | -1.18327 |
| Deoxyguanosine                    | 1.937827 | 0.374728    | -1.41608 |
| Thymidine                         | 1.782045 | 0.40478     | -1.30479 |
| N-Acetyl-5-Hydroxytryptamine      | 1.82309  | 0.488206    | -1.03444 |
| Trigonelline                      | 1.577633 | 0.324412    | -1.6241  |
| 5-Hydroxyindole-3-Acetic Acid     | 1.454545 | 0.38229     | -1.38726 |
| 5-Aminovaleric Acid               | 1.98671  | 0.163028    | -2.61681 |
| Guanidineacetic Acid              | 1.968964 | 0.15902     | -2.65272 |
| Lysopc 14:0                       | 1.634369 | 0.400325    | -1.32076 |
| L-Homoarginine                    | 1.47585  | 0.326177    | -1.61627 |
| Cys-Gly                           | 2.033062 | 0.404429    | -1.30604 |
| 2-Aminoadipic Acid                | 1.786186 | 0.397742    | -1.33009 |
| Sn-Glycero-3-Phosphocholine       | 1.783285 | 0.269669    | -1.89074 |
| Lysopc 15:0                       | 1.729342 | 0.401509    | -1.3165  |
| N-Alpha-acetyllysine              | 1.585638 | 0.310505    | -1.68731 |
| N $\alpha$ -Acetyl-L-glutamine    | 1.600599 | 0.336478    | -1.57141 |
| N-Methyl-L-Glutamate              | 1.789715 | 0.416391    | -1.26399 |



---

|                          |          |          |          |
|--------------------------|----------|----------|----------|
| Oxypurinol               | 1.44882  | 0.489499 | -1.03062 |
| D-Fructose 6-phosphate   | 1.930939 | 0.020598 | -5.60135 |
| Biotinamide              | 1.834218 | 2.901469 | 1.536783 |
| LysoPC 22:5 (2n isomer3) | 1.273888 | 0.479146 | -1.06146 |
| LysoPC 22:5 (2n isomer2) | 1.273888 | 0.479146 | -1.06146 |
| mycosporine-glutaminol   | 1.985456 | 0.084287 | -3.56855 |
| Alanine tyrosine         | 1.900552 | 0.321758 | -1.63595 |
| Carnitine C20:1-OH       | 1.300416 | 0.467793 | -1.09606 |
| Carnitine C20:5          | 1.693139 | 2.533677 | 1.341233 |
| Carnitine C18:1          | 1.241248 | 2.319046 | 1.213531 |
| Carnitine C14:2-OH       | 1.525715 | 0.371473 | -1.42867 |
| Carnitine C14:3          | 1.468972 | 3.109802 | 1.636823 |
| Carnitine C8-OH          | 1.71215  | 0.410211 | -1.28556 |
| Carnitine C6:DC          | 1.215767 | 2.110178 | 1.077365 |
| Carnitine C5:1           | 1.847976 | 2.910735 | 1.541384 |
| SDMA                     | 1.754517 | 0.422692 | -1.24232 |
| Methylguanidine          | 1.710786 | 0.277475 | -1.84957 |
| 8-Azaguanine             | 1.792085 | 0.416923 | -1.26215 |
| Glu-Met                  | 1.462634 | 0.414833 | -1.2694  |
| Met-Glu                  | 1.524639 | 0.457003 | -1.12972 |
| Carnitine C18:1 Isomer1  | 1.272752 | 2.439685 | 1.286695 |

---
